# Supplementary material
Source: publisher site journal article supplement (https://www.dovepress.com/article/327673)
Supplement: Supplementary file 1 [file get_supplementary_file.php]

**Table S1.** The clinical characteristics of the patients in this study.

| No. | Age | History                          | Stage | Grade |
|-----|-----|----------------------------------|-------|-------|
| 1   | 42  | High grade Serous ovarian cancer | IVb   | 3     |
| 2   | 83  | High grade Serous ovarian cancer | IV    | 3     |
| 3   | 57  | High grade Serous ovarian cancer | IIIc  | 3     |
| 4   | 51  | High grade Serous ovarian cancer | IIIc  | 3     |
| 5   | 68  | High grade Serous ovarian cancer | IVb   | 3     |
| 6   | 49  | High grade Serous ovarian cancer | IIIc  | 3     |
| 7   | 68  | High grade Serous ovarian cancer | IIIc  | 3     |
| 8   | 75  | High grade Serous ovarian cancer | IV    | 3     |
| 9   | 61  | High grade Serous ovarian cancer | IIIc  | 3     |
| 10  | 56  | High grade Serous ovarian cancer | IIIc  | 3     |

**Table S2.** The sequence of primers in the present study.

| Gene       |         | The sequence of primers (5'-3') |
|------------|---------|---------------------------------|
| miR-501-3p | Forward | ACGCGTTCTCCTTACCATCCCTGA        |
|            | Reverse | CGATCTGGAAGTAACCCAAGCC          |
| U6         | Forward | CTCGCTTCGGCAGCACA               |
|            | Reverse | AACGCTTCACGAATTTGCGT            |

**Table S3.** The target genes of miR-501-3p predicted by databases including TargetScan, miRanda, TarBase, miRTarBase, miR2Disease, miRecords, and miRWalk.

| miRNA name     | target gene |
|----------------|-------------|----------------|-------------|----------------|-------------|----------------|-------------|----------------|-------------|----------------|-------------|----------------|-------------|----------------|-------------|
| hsa-miR-501-3p | AAMP        | hsa-miR-501-3p | CARM1       | hsa-miR-501-3p | DSCC1       | hsa-miR-501-3p | H3F3B       | hsa-miR-501-3p | MCL1        | hsa-miR-501-3p | PEF1        | hsa-miR-501-3p | SEC23IP     | hsa-miR-501-3p | TIMM8A      |
| hsa-miR-501-3p | ABCA12      | hsa-miR-501-3p | CASC4       | hsa-miR-501-3p | DSE         | hsa-miR-501-3p | HCFC2       | hsa-miR-501-3p | MCM2        | hsa-miR-501-3p | PEG10       | hsa-miR-501-3p | SEC24A      | hsa-miR-501-3p | TJP1        |
| hsa-miR-501-3p | ABCC2       | hsa-miR-501-3p | CASP10      | hsa-miR-501-3p | DSTYK       | hsa-miR-501-3p | HDGFRP3     | hsa-miR-501-3p | MCM4        | hsa-miR-501-3p | PFKFB3      | hsa-miR-501-3p | SEC63       | hsa-miR-501-3p | TLCD2       |
| hsa-miR-501-3p | ABHD3       | hsa-miR-501-3p | CBLL1       | hsa-miR-501-3p | DTWD2       | hsa-miR-501-3p | HES5        | hsa-miR-501-3p | MDM4        | hsa-miR-501-3p | PFKL        | hsa-miR-501-3p | SELE        | hsa-miR-501-3p | TMEM106B    |
| hsa-miR-501-3p | ABLIM1      | hsa-miR-501-3p | CBX1        | hsa-miR-501-3p | DUSP16      | hsa-miR-501-3p | HGS         | hsa-miR-501-3p | MED12L      | hsa-miR-501-3p | PFN2        | hsa-miR-501-3p | SEMA3C      | hsa-miR-501-3p | TMEM123     |
| hsa-miR-501-3p | ACTN1       | hsa-miR-501-3p | CBX4        | hsa-miR-501-3p | DUSP26      | hsa-miR-501-3p | HGSNAT      | hsa-miR-501-3p | MEF2A       | hsa-miR-501-3p | PHKA1       | hsa-miR-501-3p | SEMA5A      | hsa-miR-501-3p | TMEM135     |
| hsa-miR-501-3p | ACVR1B      | hsa-miR-501-3p | CCDC141     | hsa-miR-501-3p | DUSP4       | hsa-miR-501-3p | HIF1A       | hsa-miR-501-3p | MGAT1       | hsa-miR-501-3p | PHOX2B      | hsa-miR-501-3p | SENP2       | hsa-miR-501-3p | TMEM2       |
| hsa-miR-501-3p | ADAM12      | hsa-miR-501-3p | CCDC170     | hsa-miR-501-3p | E2F1        | hsa-miR-501-3p | HLA-DRA     | hsa-miR-501-3p | MGAT5       | hsa-miR-501-3p | PHYKPL      | hsa-miR-501-3p | SEPN1       | hsa-miR-501-3p | TMEM245     |
| hsa-miR-501-3p | ADAM28      | hsa-miR-501-3p | CCDC40      | hsa-miR-501-3p | E2F3        | hsa-miR-501-3p | HMBOX1      | hsa-miR-501-3p | MGEA5       | hsa-miR-501-3p | PICALM      | hsa-miR-501-3p | SEPSECS     | hsa-miR-501-3p | TMX3        |
| hsa-miR-501-3p | ADAMTS5     | hsa-miR-501-3p | CCDC47      | hsa-miR-501-3p | E2F7        | hsa-miR-501-3p | HMGCS1      | hsa-miR-501-3p | MICB        | hsa-miR-501-3p | PIGA        | hsa-miR-501-3p | SEPT11      | hsa-miR-501-3p | TNFAIP8     |
| hsa-miR-501-3p | ADAR        | hsa-miR-501-3p | CCDC50      | hsa-miR-501-3p | ECT2        | hsa-miR-501-3p | HNRNPDL     | hsa-miR-501-3p | MID1        | hsa-miR-501-3p | PIK3R5      | hsa-miR-501-3p | SEPT7       | hsa-miR-501-3p | TNFRSF10A   |
| hsa-miR-501-3p | ADC         | hsa-miR-501-3p | CCDC77      | hsa-miR-501-3p | EEA1        | hsa-miR-501-3p | HNRNPK      | hsa-miR-501-3p | MIDN        | hsa-miR-501-3p | PIM2        | hsa-miR-501-3p | SEPT9       | hsa-miR-501-3p | TNP3        |
| hsa-miR-501-3p | ADCY7       | hsa-miR-501-3p | CCND2       | hsa-miR-501-3p | EFCAB11     | hsa-miR-501-3p | HNRNPU      | hsa-miR-501-3p | MIER1       | hsa-miR-501-3p | PLAGL2      | hsa-miR-501-3p | SERAC1      | hsa-miR-501-3p | TNNC1       |
| hsa-miR-501-3p | ADIPOQ      | hsa-miR-501-3p | CCNL2       | hsa-miR-501-3p | EGLN1       | hsa-miR-501-3p | HOMER2      | hsa-miR-501-3p | MOC3        | hsa-miR-501-3p | PLCB1       | hsa-miR-501-3p | SERPBP1     | hsa-miR-501-3p | TNRC6C      |
| hsa-miR-501-3p | AFF4        | hsa-miR-501-3p | CCP110      | hsa-miR-501-3p | EIF4G1      | hsa-miR-501-3p | HOXC13      | hsa-miR-501-3p | MORC3       | hsa-miR-501-3p | PLD3        | hsa-miR-501-3p | SERPINE2    | hsa-miR-501-3p | TOR1AIP1    |
| hsa-miR-501-3p | AFG3L2      | hsa-miR-501-3p | CCR9        | hsa-miR-501-3p | EIF4G2      | hsa-miR-501-3p | HOXD10      | hsa-miR-501-3p | MPL         | hsa-miR-501-3p | PLEKHA1     | hsa-miR-501-3p | SERPAD2     | hsa-miR-501-3p | TP53INP1    |
| hsa-miR-501-3p | AGBL5       | hsa-miR-501-3p | CD109       | hsa-miR-501-3p | ELAVL2      | hsa-miR-501-3p | HS2ST1      | hsa-miR-501-3p | MPP6        | hsa-miR-501-3p | PLEKHB2     | hsa-miR-501-3p | SES1        | hsa-miR-501-3p | TPK1        |
| hsa-miR-501-3p | AGO1        | hsa-miR-501-3p | CD200R1     | hsa-miR-501-3p | ELK4        | hsa-miR-501-3p | HSP90AB1    | hsa-miR-501-3p | MRRF        | hsa-miR-501-3p | PLK1        | hsa-miR-501-3p | SESN3       | hsa-miR-501-3p | TRDN        |
| hsa-miR-501-3p | AHCYL1      | hsa-miR-501-3p | CD83        | hsa-miR-501-3p | ELL2        | hsa-miR-501-3p | HSPA4       | hsa-miR-501-3p | MSI1        | hsa-miR-501-3p | PLS3        | hsa-miR-501-3p | SETD5       | hsa-miR-501-3p | TRIM44      |
| hsa-miR-501-3p | AHRR        | hsa-miR-501-3p | CDC27       | hsa-miR-501-3p | ELMO1       | hsa-miR-501-3p | HSPA5       | hsa-miR-501-3p | MST4        | hsa-miR-501-3p | PMAIP1      | hsa-miR-501-3p | SETD7       | hsa-miR-501-3p | TRIM5       |
| hsa-miR-501-3p | AK2         | hsa-miR-501-3p | CDC37       | hsa-miR-501-3p | ELP2        | hsa-miR-501-3p | IBA57       | hsa-miR-501-3p | MSTN        | hsa-miR-501-3p | PNPLA3      | hsa-miR-501-3p | SF3A2       | hsa-miR-501-3p | TRIM65      |
| hsa-miR-501-3p | AKAP11      | hsa-miR-501-3p | CDCA4       | hsa-miR-501-3p | EML4        | hsa-miR-501-3p | IDS         | hsa-miR-501-3p | MTCH2       | hsa-miR-501-3p | POU2F1      | hsa-miR-501-3p | SH3GLB1     | hsa-miR-501-3p | TRIM72      |
| hsa-miR-501-3p | AKAP5       | hsa-miR-501-3p | CDK6        | hsa-miR-501-3p | EMP2        | hsa-miR-501-3p | IER2        | hsa-miR-501-3p | MTHFD2      | hsa-miR-501-3p | PPARA       | hsa-miR-501-3p | SH3PXD2A    | hsa-miR-501-3p | TRMT10A     |
| hsa-miR-501-3p | AKIRIN1     | hsa-miR-501-3p | CDK9        | hsa-miR-501-3p | ENTHD1      | hsa-miR-501-3p | IL21R       | hsa-miR-501-3p | MTPN        | hsa-miR-501-3p | PPP1R15B    | hsa-miR-501-3p | SIGLEC15    | hsa-miR-501-3p | TROVE2      |
| hsa-miR-501-3p | AKT1        | hsa-miR-501-3p | CDKN1B      | hsa-miR-501-3p | ENTPD7      | hsa-miR-501-3p | IL24        | hsa-miR-501-3p | MTR         | hsa-miR-501-3p | PPP1R3C     | hsa-miR-501-3p | SIX4        | hsa-miR-501-3p | TRPA1       |
| hsa-miR-501-3p | ALDH18A1    | hsa-miR-501-3p | CDKN2B      | hsa-miR-501-3p | EPAS1       | hsa-miR-501-3p | INIP        | hsa-miR-501-3p | MYCN        | hsa-miR-501-3p | PPP2R2C     | hsa-miR-501-3p | SKIL        | hsa-miR-501-3p | TRPS1       |
| hsa-miR-501-3p | ALDH1L2     | hsa-miR-501-3p | CDV3        | hsa-miR-501-3p | EPDR1       | hsa-miR-501-3p | INPP4A      | hsa-miR-501-3p | MYLIP       | hsa-miR-501-3p | PPP4R2      | hsa-miR-501-3p | SLA2        | hsa-miR-501-3p | TSPAN4      |
| hsa-miR-501-3p | AMN1        | hsa-miR-501-3p | CEACAM1     | hsa-miR-501-3p | EPHB2       | hsa-miR-501-3p | INPP5F      | hsa-miR-501-3p | MYO3B       | hsa-miR-501-3p | PPP6C       | hsa-miR-501-3p | SLC1A4      | hsa-miR-501-3p | TSPEAR      |
| hsa-miR-501-3p | ANKFY1      | hsa-miR-501-3p | CENPQ       | hsa-miR-501-3p | EPN2        | hsa-miR-501-3p | INSIG1      | hsa-miR-501-3p | MYOZ3       | hsa-miR-501-3p | PRG2        | hsa-miR-501-3p | SLC25A13    | hsa-miR-501-3p | TTC37       |
| hsa-miR-501-3p | ANKRD13A    | hsa-miR-501-3p | ANKRD13A    | hsa-miR-501-3p | CEP19       | hsa-miR-501-3p | IQSEC1      | hsa-miR-501-3p | NAA11       | hsa-miR-501-3p | PRICKLE2    | hsa-miR-501-3p | SLC25A36    | hsa-miR-501-3p | TLL5        |
| hsa-miR-501-3p | ANKRD46     | hsa-miR-501-3p | CERS6       | hsa-miR-501-3p | ERC2        | hsa-miR-501-3p | IRAK3       | hsa-miR-501-3p | NAA30       | hsa-miR-501-3p | PRKD3       | hsa-miR-501-3p | SLC2A12     | hsa-miR-501-3p | TUB         |
| hsa-miR-501-3p | ANKRD50     | hsa-miR-501-3p | CHD6        | hsa-miR-501-3p | ERO1LB      | hsa-miR-501-3p | IRF1        | hsa-miR-501-3p | NAA40       | hsa-miR-501-3p | PRKX        | hsa-miR-501-3p | SLC30A8     | hsa-miR-501-3p | TULP4       |
| hsa-miR-501-3p | ANP32E      | hsa-miR-501-3p | CHKA        | hsa-miR-501-3p | ESRRG       | hsa-miR-501-3p | IRF4        | hsa-miR-501-3p | NAA60       | hsa-miR-501-3p | PRPF40A     | hsa-miR-501-3p | SLC35A1     | hsa-miR-501-3p | TUSC1       |
| hsa-miR-501-3p | AP1G1       | hsa-miR-501-3p | CHML        | hsa-miR-501-3p | ETNK1       | hsa-miR-501-3p | IRGQ        | hsa-miR-501-3p | NAB1        | hsa-miR-501-3p | PRPH2       | hsa-miR-501-3p | SLC35E1     | hsa-miR-501-3p | TXLNA       |
| hsa-miR-501-3p | AP3F1       | hsa-miR-501-3p | CHMP1B      | hsa-miR-501-3p | EZH2        | hsa-miR-501-3p | ITGA3       | hsa-miR-501-3p | NAE1        | hsa-miR-501-3p | PSMB4       | hsa-miR-501-3p | SLC38A1     | hsa-miR-501-3p | UBA6        |
| hsa-miR-501-3p | APAF1       | hsa-miR-501-3p | CHODL       | hsa-miR-501-3p | F3          | hsa-miR-501-3p | ITGA9       | hsa-miR-501-3p | NAP1L5      | hsa-miR-501-3p | PSMD6       | hsa-miR-501-3p | SLC39A14    | hsa-miR-501-3p | UBE2H       |
| hsa-miR-501-3p | APH1A       | hsa-miR-501-3p | CHST13      | hsa-miR-501-3p | F8          | hsa-miR-501-3p | ITGAV       | hsa-miR-501-3p | NAT8L       | hsa-miR-501-3p | PSMG1       | hsa-miR-501-3p | SLC5A1      | hsa-miR-501-3p | UBE2N       |
| hsa-miR-501-3p | APOL1       | hsa-miR-501-3p | CIT         | hsa-miR-501-3p | FAM120C     | hsa-miR-501-3p | ITGB3BP     | hsa-miR-501-3p | NBEA        | hsa-miR-501-3p | PTGDR2      | hsa-miR-501-3p | SLC6A20     | hsa-miR-501-3p | UBE2V1      |
| hsa-miR-501-3p | APOL2       | hsa-miR-501-3p | CLASP1      | hsa-miR-501-3p | FAM129A     | hsa-miR-501-3p | ITM2B       | hsa-miR-501-3p | NBR1        | hsa-miR-501-3p | PTGS2       | hsa-miR-501-3p | SLC6A8      | hsa-miR-501-3p | UBE2W       |
| hsa-miR-501-3p | APOL4       | hsa-miR-501-3p | CLDN11      | hsa-miR-501-3p | FAM177A1    | hsa-miR-501-3p | JADE1       | hsa-miR-501-3p | NCAPD2      | hsa-miR-501-3p | PTPA1       | hsa-miR-501-3p | SLC7A1      | hsa-miR-501-3p | UBL3        |
| hsa-miR-501-3p | ARHGFE10    | hsa-miR-501-3p | ARHGFE10    | hsa-miR-501-3p | FAM208B     | hsa-miR-501-3p | JAZF1       | hsa-miR-501-3p | NCAPG2      | hsa-miR-501-3p | PTPN12      | hsa-miR-501-3p | SLC7A14     | hsa-miR-501-3p | UBL4A       |
| hsa-miR-501-3p | ARHGFE15    | hsa-miR-501-3p | CLIC4       | hsa-miR-501-3p | FAM217B     | hsa-miR-501-3p | KCNA1       | hsa-miR-501-3p | NCKAP1      | hsa-miR-501-3p | PTPN4       | hsa-miR-501-3p | SLC9A7      | hsa-miR-501-3p | UBQLN1      |
| hsa-miR-501-3p | ARID5B      | hsa-miR-501-3p | CLN5        | hsa-miR-501-3p | FAM219B     | hsa-miR-501-3p | KCNC3       | hsa-miR-501-3p | NCOA4       | hsa-miR-501-3p | PTPRK       | hsa-miR-501-3p | SMC3        | hsa-miR-501-3p | UBR7        |
| hsa-miR-501-3p | ARL4C       | hsa-miR-501-3p | CLNS1A      | hsa-miR-501-3p | FAM49B      | hsa-miR-501-3p | KCNJ6       | hsa-miR-501-3p | NDRG1       | hsa-miR-501-3p | PURA        | hsa-miR-501-3p | SMG1        | hsa-miR-501-3p | UCP3        |
| hsa-miR-501-3p | ARL6IP1     | hsa-miR-501-3p | CNBP        | hsa-miR-501-3p | FAM91A1     | hsa-miR-501-3p | KCNT1       | hsa-miR-501-3p | NDS1        | hsa-miR-501-3p | PYHIN1      | hsa-miR-501-3p | SMG5        | hsa-miR-501-3p | UGT2B10     |
| hsa-miR-501-3p | ARL8B       | hsa-miR-501-3p | CNDP2       | hsa-miR-501-3p | FBN2        | hsa-miR-501-3p | KCTD20      | hsa-miR-501-3p | NEFM        | hsa-miR-501-3p | QSER1       | hsa-miR-501-3p | SMIM13      | hsa-miR-501-3p | UNC45B      |
| hsa-miR-501-3p | ARMC10      | hsa-miR-501-3p | CNIH1       | hsa-miR-501-3p | FBXO3       | hsa-miR-501-3p | KDSR        | hsa-miR-501-3p | NEK7        | hsa-miR-501-3p | R3HDM2      | hsa-miR-501-3p | SMIM14      | hsa-miR-501-3p | UNC50       |
| hsa-miR-501-3p | ARPC1B      | hsa-miR-501-3p | CNOT4       | hsa-miR-501-3p | FBXO4       | hsa-miR-501-3p | KIAA0040    | hsa-miR-501-3p | NF1         | hsa-miR-501-3p | RAB11FIP3   | hsa-miR-501-3p | SMIM17      | hsa-miR-501-3p | USP14       |
| hsa-miR-501-3p | ASAP1       | hsa-miR-501-3p | CNOT6       | hsa-miR-501-3p | FBXO5       | hsa-miR-501-3p | KIAA1462    | hsa-miR-501-3p | NFAT5       | hsa-miR-501-3p | RAB3GAP2    | hsa-miR-501-3p | SNRPD3      | hsa-miR-501-3p | USP35       |
| hsa-miR-501-3p | ASF1A       | hsa-miR-501-3p | COL10A1     | hsa-miR-501-3p | FCGR1A      | hsa-miR-501-3p | KIAA1549    | hsa-miR-501-3p | NFIB        | hsa-miR-501-3p | RAB5B       | hsa-miR-501-3p | SNX19       | hsa-miR-501-3p | USPL1       |
| hsa-miR-501-3p | ATF7IP      | hsa-miR-501-3p | COL12A1     | hsa-miR-501-3p | FCN2        | hsa-miR-501-3p | KIF21A      | hsa-miR-501-3p | NIPAL4      | hsa-miR-501-3p | RAB6A       | hsa-miR-501-3p | SNX22       | hsa-miR-501-3p | UTP14C      |
| hsa-miR-501-3p | ATF7IP2     | hsa-miR-501-3p | COL23A1     | hsa-miR-501-3p | FDXR        | hsa-miR-501-3p | KIF5B       | hsa-miR-501-3p | NLGN4X      | hsa-miR-501-3p | RAD21       | hsa-miR-501-3p | SOC56       | hsa-miR-501-3p | WDR44       |
| hsa-miR-501-3p | ATIC        | hsa-miR-501-3p | COL25A1     | hsa-miR-501-3p | FECH        | hsa-miR-501-3p | KLF6        | hsa-miR-501-3p | NME6        | hsa-miR-501-3p | RAD23B      | hsa-miR-501-3p | SOC57       | hsa-miR-501-3p | WDR82P1     |

|                |          |                |         |                |          |                |           |                |          |                |         |                |         |                |         |
|----------------|----------|----------------|---------|----------------|----------|----------------|-----------|----------------|----------|----------------|---------|----------------|---------|----------------|---------|
| hsa-miR-501-3p | ATL1     | hsa-miR-501-3p | COL4A3  | hsa-miR-501-3p | FGF23    | hsa-miR-501-3p | KLHL13    | hsa-miR-501-3p | NOL8     | hsa-miR-501-3p | RAD51C  | hsa-miR-501-3p | SOD2    | hsa-miR-501-3p | WEE1    |
| hsa-miR-501-3p | ATP1B1   | hsa-miR-501-3p | COL5A1  | hsa-miR-501-3p | FGF9     | hsa-miR-501-3p | KLHL14    | hsa-miR-501-3p | NONO     | hsa-miR-501-3p | RAI2    | hsa-miR-501-3p | SON     | hsa-miR-501-3p | WNK1    |
| hsa-miR-501-3p | ATP2A2   | hsa-miR-501-3p | COQ10B  | hsa-miR-501-3p | FGFR1OP  | hsa-miR-501-3p | KLK2      | hsa-miR-501-3p | NOS1AP   | hsa-miR-501-3p | RAPGEF2 | hsa-miR-501-3p | SP7     | hsa-miR-501-3p | WSB1    |
| hsa-miR-501-3p | ATP2B1   | hsa-miR-501-3p | CPNE3   | hsa-miR-501-3p | FXJ1     | hsa-miR-501-3p | KLLN      | hsa-miR-501-3p | NOTCH4   | hsa-miR-501-3p | RAPGEF6 | hsa-miR-501-3p | SPCS3   | hsa-miR-501-3p | WWC1    |
| hsa-miR-501-3p | ATP6V1B2 | hsa-miR-501-3p | CREBZF  | hsa-miR-501-3p | FKTN     | hsa-miR-501-3p | KMO       | hsa-miR-501-3p | NOV      | hsa-miR-501-3p | RASGRF2 | hsa-miR-501-3p | SPOCK1  | hsa-miR-501-3p | XPC     |
| hsa-miR-501-3p | ATP7B    | hsa-miR-501-3p | CRK     | hsa-miR-501-3p | FNIP1    | hsa-miR-501-3p | KRAS      | hsa-miR-501-3p | NPC2     | hsa-miR-501-3p | RASSF3  | hsa-miR-501-3p | SPTBN1  | hsa-miR-501-3p | XPO1    |
| hsa-miR-501-3p | ATP8A2   | hsa-miR-501-3p | CRKL    | hsa-miR-501-3p | FOS      | hsa-miR-501-3p | KRT85     | hsa-miR-501-3p | NPHS1    | hsa-miR-501-3p | RASSF5  | hsa-miR-501-3p | SPTSSA  | hsa-miR-501-3p | XRCC1   |
| hsa-miR-501-3p | ATXN1    | hsa-miR-501-3p | CRTC3   | hsa-miR-501-3p | FOXJ3    | hsa-miR-501-3p | LARS      | hsa-miR-501-3p | NPTX1    | hsa-miR-501-3p | RBM12B  | hsa-miR-501-3p | SRSF3   | hsa-miR-501-3p | YPEL2   |
| hsa-miR-501-3p | AURKB    | hsa-miR-501-3p | CSK     | hsa-miR-501-3p | FOXO1    | hsa-miR-501-3p | LATS1     | hsa-miR-501-3p | NPTXR    | hsa-miR-501-3p | RBM3    | hsa-miR-501-3p | SS18L1  | hsa-miR-501-3p | YTHDF3  |
| hsa-miR-501-3p | BACE2    | hsa-miR-501-3p | CSNK1A1 | hsa-miR-501-3p | FOXP2    | hsa-miR-501-3p | LBP       | hsa-miR-501-3p | NR1D2    | hsa-miR-501-3p | RC3H1   | hsa-miR-501-3p | SSH1    | hsa-miR-501-3p | YWHAQ   |
| hsa-miR-501-3p | BAZ1B    | hsa-miR-501-3p | CSRP1   | hsa-miR-501-3p | FRMD6    | hsa-miR-501-3p | LCOR      | hsa-miR-501-3p | NR2C2    | hsa-miR-501-3p | RCC2    | hsa-miR-501-3p | SSR3    | hsa-miR-501-3p | ZBTB10  |
| hsa-miR-501-3p | BBS10    | hsa-miR-501-3p | CSTB    | hsa-miR-501-3p | FRS2     | hsa-miR-501-3p | LDHA      | hsa-miR-501-3p | NRAS     | hsa-miR-501-3p | RCHY1   | hsa-miR-501-3p | SSTR1   | hsa-miR-501-3p | ZBTB11  |
| hsa-miR-501-3p | BCAT2    | hsa-miR-501-3p | CTBP1   | hsa-miR-501-3p | FUT6     | hsa-miR-501-3p | LDHB      | hsa-miR-501-3p | NRBF2    | hsa-miR-501-3p | RCOR1   | hsa-miR-501-3p | SSX1    | hsa-miR-501-3p | ZBTB18  |
| hsa-miR-501-3p | BCL2     | hsa-miR-501-3p | CTNND1  | hsa-miR-501-3p | G6PC     | hsa-miR-501-3p | LDLR      | hsa-miR-501-3p | NRIP1    | hsa-miR-501-3p | REV3L   | hsa-miR-501-3p | SSX2IP  | hsa-miR-501-3p | ZBTB33  |
| hsa-miR-501-3p | BCOR     | hsa-miR-501-3p | CTPS1   | hsa-miR-501-3p | GABARAPL | hsa-miR-501-3p | LIFR      | hsa-miR-501-3p | NTNG1    | hsa-miR-501-3p | RHOA    | hsa-miR-501-3p | SSX3    | hsa-miR-501-3p | ZBTB43  |
| hsa-miR-501-3p | BDP1     | hsa-miR-501-3p | CITN    | hsa-miR-501-3p | GABPB2   | hsa-miR-501-3p | LIG4      | hsa-miR-501-3p | NUDT16L1 | hsa-miR-501-3p | RIMS1   | hsa-miR-501-3p | ST8SIA5 | hsa-miR-501-3p | ZC3H12C |
| hsa-miR-501-3p | BHLHE22  | hsa-miR-501-3p | CYP27C1 | hsa-miR-501-3p | GAN      | hsa-miR-501-3p | LINC00632 | hsa-miR-501-3p | NUFIP2   | hsa-miR-501-3p | RIN2    | hsa-miR-501-3p | STAG2   | hsa-miR-501-3p | ZC4H2   |
| hsa-miR-501-3p | BHLHE41  | hsa-miR-501-3p | CYP2U1  | hsa-miR-501-3p | GATAD1   | hsa-miR-501-3p | LINC00955 | hsa-miR-501-3p | NUPL1    | hsa-miR-501-3p | RLF     | hsa-miR-501-3p | STARD7  | hsa-miR-501-3p | ZCCHC14 |
| hsa-miR-501-3p | BHMT2    | hsa-miR-501-3p | CYP39A1 | hsa-miR-501-3p | GDF6     | hsa-miR-501-3p | LIPA      | hsa-miR-501-3p | NXT2     | hsa-miR-501-3p | RNF149  | hsa-miR-501-3p | STAT2   | hsa-miR-501-3p | ZDHHC15 |
| hsa-miR-501-3p | BICD2    | hsa-miR-501-3p | CYP4F11 | hsa-miR-501-3p | GDNF     | hsa-miR-501-3p | LITAF     | hsa-miR-501-3p | OCFRL1   | hsa-miR-501-3p | RNMT    | hsa-miR-501-3p | STAT3   | hsa-miR-501-3p | ZDHHC4  |
| hsa-miR-501-3p | BMP7     | hsa-miR-501-3p | DAG1    | hsa-miR-501-3p | GIPR     | hsa-miR-501-3p | LMNB2     | hsa-miR-501-3p | OGT      | hsa-miR-501-3p | RPH3AL  | hsa-miR-501-3p | STIM2   | hsa-miR-501-3p | ZFP91   |
| hsa-miR-501-3p | BMPER    | hsa-miR-501-3p | DAP     | hsa-miR-501-3p | GJA1     | hsa-miR-501-3p | LOX       | hsa-miR-501-3p | OIP5     | hsa-miR-501-3p | RPL15   | hsa-miR-501-3p | STK17A  | hsa-miR-501-3p | ZIC4    |
| hsa-miR-501-3p | BNIP3    | hsa-miR-501-3p | DAPK1   | hsa-miR-501-3p | GJA3     | hsa-miR-501-3p | LPHN1     | hsa-miR-501-3p | OLIG2    | hsa-miR-501-3p | RPL4    | hsa-miR-501-3p | STK38   | hsa-miR-501-3p | ZMAT2   |
| hsa-miR-501-3p | BRAF     | hsa-miR-501-3p | DAPP1   | hsa-miR-501-3p | GJD3     | hsa-miR-501-3p | LPIN1     | hsa-miR-501-3p | OPCML    | hsa-miR-501-3p | RPRD1B  | hsa-miR-501-3p | SUB1    | hsa-miR-501-3p | ZMAT3   |
| hsa-miR-501-3p | BRD2     | hsa-miR-501-3p | DCAF7   | hsa-miR-501-3p | GLCCII   | hsa-miR-501-3p | LPL       | hsa-miR-501-3p | OPN3     | hsa-miR-501-3p | RPS29   | hsa-miR-501-3p | SUDS3   | hsa-miR-501-3p | ZMYM2   |
| hsa-miR-501-3p | BRD4     | hsa-miR-501-3p | DCAF8   | hsa-miR-501-3p | GLI2     | hsa-miR-501-3p | LPP       | hsa-miR-501-3p | ORC6     | hsa-miR-501-3p | RPS3    | hsa-miR-501-3p | SUFU    | hsa-miR-501-3p | ZNF219  |
| hsa-miR-501-3p | BRWD1    | hsa-miR-501-3p | DCP2    | hsa-miR-501-3p | GLS2     | hsa-miR-501-3p | LRIT3     | hsa-miR-501-3p | OSER1    | hsa-miR-501-3p | RPS4Y1  | hsa-miR-501-3p | SUMF1   | hsa-miR-501-3p | ZNF264  |
| hsa-miR-501-3p | BRWD3    | hsa-miR-501-3p | DDHD2   | hsa-miR-501-3p | GM2A     | hsa-miR-501-3p | LRRC58    | hsa-miR-501-3p | OTUD4    | hsa-miR-501-3p | RQCD1   | hsa-miR-501-3p | SUMO1   | hsa-miR-501-3p | ZNF367  |
| hsa-miR-501-3p | BSPRY    | hsa-miR-501-3p | DDX24   | hsa-miR-501-3p | GNAQ     | hsa-miR-501-3p | LRRC59    | hsa-miR-501-3p | P2RX1    | hsa-miR-501-3p | RRM2B   | hsa-miR-501-3p | SYK     | hsa-miR-501-3p | ZNF460  |
| hsa-miR-501-3p | BTBD7    | hsa-miR-501-3p | DDX3X   | hsa-miR-501-3p | GNB1     | hsa-miR-501-3p | LRRC8B    | hsa-miR-501-3p | PACS1    | hsa-miR-501-3p | RSBN1   | hsa-miR-501-3p | SYT1    | hsa-miR-501-3p | ZNF473  |
| hsa-miR-501-3p | BTF3L4   | hsa-miR-501-3p | DDX54   | hsa-miR-501-3p | GNPNAT1  | hsa-miR-501-3p | LSM4      | hsa-miR-501-3p | PAFAH1B1 | hsa-miR-501-3p | RSBN1L  | hsa-miR-501-3p | SYTL4   | hsa-miR-501-3p | ZNF503  |
| hsa-miR-501-3p | BTG3     | hsa-miR-501-3p | DENND4B | hsa-miR-501-3p | GOLT1A   | hsa-miR-501-3p | LYRM7     | hsa-miR-501-3p | PAFAH1B2 | hsa-miR-501-3p | RUNXIT1 | hsa-miR-501-3p | TAB3    | hsa-miR-501-3p | ZNF574  |
| hsa-miR-501-3p | C10orf54 | hsa-miR-501-3p | DENR    | hsa-miR-501-3p | GOPC     | hsa-miR-501-3p | LYSMD3    | hsa-miR-501-3p | PANK3    | hsa-miR-501-3p | RYBP    | hsa-miR-501-3p | TAF9    | hsa-miR-501-3p | ZNF605  |
| hsa-miR-501-3p | C11orf58 | hsa-miR-501-3p | DGKB    | hsa-miR-501-3p | GP6      | hsa-miR-501-3p | LZTR1     | hsa-miR-501-3p | PARL     | hsa-miR-501-3p | S100A11 | hsa-miR-501-3p | TAOK1   | hsa-miR-501-3p | ZNF644  |
| hsa-miR-501-3p | C1orf131 | hsa-miR-501-3p | DHX33   | hsa-miR-501-3p | GPBP1L1  | hsa-miR-501-3p | MAB21L1   | hsa-miR-501-3p | PATL1    | hsa-miR-501-3p | S100PBP | hsa-miR-501-3p | TAOK3   | hsa-miR-501-3p | ZNF655  |
| hsa-miR-501-3p | C1orf52  | hsa-miR-501-3p | DHX40   | hsa-miR-501-3p | GPD1L    | hsa-miR-501-3p | MAGED2    | hsa-miR-501-3p | PAX9     | hsa-miR-501-3p | SACS    | hsa-miR-501-3p | TARDBP  | hsa-miR-501-3p | ZNF664  |
| hsa-miR-501-3p | C2orf43  | hsa-miR-501-3p | DIAPH1  | hsa-miR-501-3p | GPLD1    | hsa-miR-501-3p | MANBAL    | hsa-miR-501-3p | PCDHB16  | hsa-miR-501-3p | SAE1    | hsa-miR-501-3p | TBC1D15 | hsa-miR-501-3p | ZNF674  |
| hsa-miR-501-3p | C4orf26  | hsa-miR-501-3p | DLG2    | hsa-miR-501-3p | GPR160   | hsa-miR-501-3p | MAP4K3    | hsa-miR-501-3p | PCGF3    | hsa-miR-501-3p | SAMSN1  | hsa-miR-501-3p | TBC1D20 | hsa-miR-501-3p | ZNF714  |
| hsa-miR-501-3p | C8orf33  | hsa-miR-501-3p | DLGAP2  | hsa-miR-501-3p | GREB1L   | hsa-miR-501-3p | MAPK1     | hsa-miR-501-3p | PCNXL4   | hsa-miR-501-3p | SBNO1   | hsa-miR-501-3p | TBCC    | hsa-miR-501-3p | ZNF827  |
| hsa-miR-501-3p | C8orf37  | hsa-miR-501-3p | DMXL2   | hsa-miR-501-3p | GRIK4    | hsa-miR-501-3p | MAPK11P1L | hsa-miR-501-3p | PCSK6    | hsa-miR-501-3p | SCAF11  | hsa-miR-501-3p | TBL1XR1 | hsa-miR-501-3p | ZXDB    |
| hsa-miR-501-3p | C9orf72  | hsa-miR-501-3p | DNAJB14 | hsa-miR-501-3p | GRM1     | hsa-miR-501-3p | MAPKAPK2  | hsa-miR-501-3p | PCSK9    | hsa-miR-501-3p | SCN2A   | hsa-miR-501-3p | TCEAL4  | hsa-miR-501-3p |         |
| hsa-miR-501-3p | CA12     | hsa-miR-501-3p | DNAJC19 | hsa-miR-501-3p | GRM6     | hsa-miR-501-3p | MARCH6    | hsa-miR-501-3p | PDE4C    | hsa-miR-501-3p | SCN2B   | hsa-miR-501-3p | TCF7    | hsa-miR-501-3p |         |
| hsa-miR-501-3p | CALM3    | hsa-miR-501-3p | DOCK8   | hsa-miR-501-3p | GSK3B    | hsa-miR-501-3p | MARCKS    | hsa-miR-501-3p | PDIA6    | hsa-miR-501-3p | SCN3A   | hsa-miR-501-3p | TDP2    | hsa-miR-501-3p |         |
| hsa-miR-501-3p | CAMKK2   | hsa-miR-501-3p | DOK1    | hsa-miR-501-3p | GTF2E1   | hsa-miR-501-3p | MBL2      | hsa-miR-501-3p | PDIK1L   | hsa-miR-501-3p | SCN4B   | hsa-miR-501-3p | TENM2   | hsa-miR-501-3p |         |
| hsa-miR-501-3p | CAMTA1   | hsa-miR-501-3p | DPEP3   | hsa-miR-501-3p | GTPBP2   | hsa-miR-501-3p | MBNL1     | hsa-miR-501-3p | PDLIM5   | hsa-miR-501-3p | SCO1    | hsa-miR-501-3p | TET3    | hsa-miR-501-3p |         |
| hsa-miR-501-3p | CANX     | hsa-miR-501-3p | DPH6    | hsa-miR-501-3p | GUCD1    | hsa-miR-501-3p | MBTD1     | hsa-miR-501-3p | PDP2     | hsa-miR-501-3p | SCRIB   | hsa-miR-501-3p | TFCP2L1 | hsa-miR-501-3p |         |
| hsa-miR-501-3p | CARD8    | hsa-miR-501-3p | DRD1    | hsa-miR-501-3p | GXYLT1   | hsa-miR-501-3p | MCC       | hsa-miR-501-3p | PDZD2    | hsa-miR-501-3p | SEC11C  | hsa-miR-501-3p | TGOLN2  | hsa-miR-501-3p |         |

**Table S4.** The down regulated genes in OC from GSE14407.

| Gene names   | Gene names   | Gene names   | Gene names   | Gene names | Gene names   | Gene names   | Gene names   | Gene names   | Gene names   | Gene names   | Gene names | Gene names   | Gene names   | Gene names | Gene names |
|--------------|--------------|--------------|--------------|------------|--------------|--------------|--------------|--------------|--------------|--------------|------------|--------------|--------------|------------|------------|
| LOC101928554 | WFDC2        | SYT13        | ELOVL6       | LEMD1      | ARHGAP8      | RGS16        | KIAA1524     | PKD1L1       | CLEC18A      | MAGEA11      | UNC5C      | LIPH         | TJP3         | GRIA2      |            |
| CENPF        | SNF          | AURKA        | ADGRL4       | CX3CL1     | STON2        | DIP2A        | EHF          | MND1         | PLEKHA5      | SYCN         | ZAP70      | HCRT         | LOC100506411 | SMC4       |            |
| SPON1        | DTL          | RALGAPB      | PTH2R        | STC2       | RAB26        | SYTL1        | LDB1         | TCIRG1       | HIST1H3F     | TMEM61       | SLC5A12    | TRMT1        | COL5A1       | CERS1      |            |
| OVOS2        | SPAG11A      | LOC105379499 | LIMK1        | CKAP2L     | RAPGEF3      | VCAN         | AHRR         | CHPF2        | DIAPH3       | LOC100506472 | INTS4      | CLDN4        | DUXAP10      | PRSS33     |            |
| DTL          | KIAA1217     | CSPG5        | CD24         | TOP2A      | ALOX12P2     | EXOSC4       | DUSP2        | DIRAS2       | CAPN12       | NOCT         | DPEP3      | TNFRSF25     | HIST1H1T     | TLR8-AS1   |            |
| MUC1         | CBX2         | GIN52        | EPCAM        | ECT2       | SCNN1A       | ZEB1         | MARVELD1     | SNHG17       | DGKK         | TMTC1        | CALCA      | DLGAP5       | ABI3BP       | PTPN23     |            |
| BUB1B        | MICALL2      | CENPU        | ULK1         | NRTN       | HLA-DOB      | FLT1         | RTFDC1       | GPSM2        | TM4SF18      | RGS1         | UGT8       | LINC01419    | HELLS        | AJAP1      |            |
| CDCA3        | C1orf106     | NEIL3        | KCNMB3       | MSTO2P     | DNA2         | FRMD8        | ENG          | GET4         | IBSP         | ZNF257       | GLYAT      | SGK494       | LOC101928847 | NR5A2      |            |
| MCM10        | CP           | OIP5         | TROAP        | OR7E12P    | NTN5         | TSPAN12      | CSPG4        | CHMP4C       | FUT8-AS1     | MAGEA4       | CCDC88C    | L3MBTL1      | FAM71F1      | KLF14      |            |
| LOC100129098 | FAM69B       | PSRC1        | THSD4        | EFNA3      | FGD5         | PTPRC        | ST6GALNAC2   | LOC286178    | C9orf16      | TRA2A        | POFUT1     | TAF6L        | NTS          | GCAT       |            |
| ZWINT        | TTK          | CDYL         | BIRC5        | KLK6       | RDM1         | ELF3         | HIGD1B       | DEFB126      | RAPGEF5      | FAM107A      | PATZ1      | SYK          | MDK          | MAGEC1     |            |
| PTTG3P       | CELSR3       | FANCD2       | CD24         | CFL1       | AGFG2        | LOC100507334 | UHRF1BP1     | ST8SIA2      | TBX1         | LOC101060391 | WDR72      | LOC102725343 | LYPD6B       | KCCAT333   |            |
| ZIC1         | RM12         | PRIMA1       | RNF183       | GPR158     | HAPLN1       | EHF          | EPHX4        | ATAD5        | CDCA2        | LCN12        | AGMAT      | C3orf30      | CSNK1E       | CST5       |            |
| SPON1        | PLEKHG2      | MELK         | CDCA5        | ORAOV1     | SST          | DEFB1        | LINC01558    | CASKIN1      | NEAT1        | DELMOD2      | FAM149B1   | GPR39        | COL9A1       | RHEB       |            |
| IQGAP3       | PCDH19       | PTX3         | KAZALD1      | CDH6       | SEC61A2      | GALNT6       | MAPK12       | BCL11A       | C1orf186     | ESAM         | HDAC7      | LCAL1        | TFR2         | HCG8       |            |
| S100A1       | MIR24-2      | SEMA3F       | COL12A1      | FRYL       | CLDN3        | KDM4C        | PCDHB8       | HOXB7        | POTEM        | CYP26B1      | D21S2090E  | MTG2         | SDC3         | UGT2B17    |            |
| LRP8         | PSAT1        | MAL          | RC3H1        | ZNF592     | VCAN         | KIF15        | ESCO2        | PPM1H        | F2RL1        | HMGA2        | THRSP      | LOC100288966 | ADAMTS14     | IGFBP3     |            |
| NUSAP1       | BBOX1-AS1    | TMEFF2       | PAQR4        | RNFT2      | LIX1         | LOC285043    | LOC374890    | IGFBP2       | MYLPF        | DIS3L2       | VP59D1     | ZSCAN4       | LINC00494    | SYCP2      |            |
| SLC4A11      | LZTS3        | MECOM        | KCNT1        | LINC01297  | PRSS2        | CLRN1        | SEMA5B       | PPARD        | CT55         | RNF212       | MPZL2      | HSPG2        | NPSR1-AS1    | LINC00458  |            |
| KLK7         | MTFR2        | L1CAM        | CD93         | FGF18      | KCNN2        | TRPM1        | CADPS        | WFDC10B      | LIPG         | DEPDC1B      | HMH1B1     | PTGES3L      | PAX8         | LRRC37A8P  |            |
| APOLD1       | LZTS1        | ADGRG1       | TMEM44       | TAZ        | C6orf223     | GPM6B        | GPR160       | KLK7         | NRSN1        | LOC100507634 | NME8       | PAX8         | RNASE11      | KIFC2      |            |
| ESPL1        | MREG         | SLC52A2      | FOXM1        | FJX1       | CYP27B1      | FAM155B      | DNAJC13      | TBX2         | LOC100505938 | TERB2        | SBK1       | NUSAP1       | CUX2         | OR9A1P     |            |
| XO17         | SCRIB        | CD20         | ESM1         | TMTC1      | HIST1H2BD    | E2F1         | DUXAP8       | ELF3         | GART         | CXCL14       | IGHV7-81   | CCDC88C      | C12orf40     | F2RL2      |            |
| KIF20A       | UHRF1        | ESRP1        | SZT2         | PNMA3      | DLX6-AS1     | ATP2A1-AS1   | VMA21        | CENPE        | LOC79160     | NRXN1        | ZNF365     | CENPN        | DACH1        | LPAR3      |            |
| VEGFA        | CDC25A       | SEC61A1      | CTPS2        | ZC2HC1B    | MMP11        | CENPN        | MAP4K1       | ITGB2-AS1    | MUC16        | METTL7B      | WNK2       | SMIM21       | LINC00265    | HAPLN4     |            |
| SLC2A1       | SPAG5        | RRM2         | LINC01215    | RASAL1     | RAB26        | AATK         | C21orf58     | MMP7         | NRN1         | HLA-DOA      | NR5A2      | LETM1        | GPAT2        | MVB12A     |            |
| NEK2         | GLI4         | GAS2L3       | WFDC1        | E2F7       | PACSIN1      | MCM4         | LOC100996345 | C22orf42     | LOC101929988 | STX17-AS1    | MARS       | PMS2P2       | ATP6V1B1     | LIFR-AS1   |            |
| RRM2         | PRC1         | MKI67        | RAD51AP1     | MYO3B      | PROM2        | SLC6A8       | MACC1        | TAS2R39      | PACSIN3      | ZIC1         | SLC1A7     | KCNK10       | KLHL22       | ZFAND2B    |            |
| SPON1        | FAM83D       | LOC105369635 | SHANK3       | LOC648987  | OCA2         | PPP1R14B     | F11          | MMP1         | FBXL17       | LINC01405    | LOC286359  | SCNN1G       | HTR2C        | LOC728485  |            |
| ESPL1        | NUF2         | FAM171A1     | SYNM         | CD82       | PAX8         | HK2          | LINC01312    | COL22A1      | CDK1         | HAP1         | RPS6KA4    | TFDP1        | SNHG4        | SCGB1D2    |            |
| PRAME        | SULT1C2      | RNPEPL1      | SPC25        | ZNF627     | PLXND1       | ARID4B       | KAAG1        | TYRP1        | HIGD2A       | LOC100506797 | SLCO1A2    | HOXB4        | NCOR1        | C2orf88    |            |
| KIF18B       | CD24         | POLG         | FILIP1       | GPR19      | LHX1         | LRRC32       | AJAP1        | CD24         | NEAT1        | PPP4R1L      | HPDL       | C11orf80     | TIGIT        | CCDC169    |            |
| DEPDC1       | BLM          | MCM10        | HDGF         | ALPK3      | KNL1         | IQSEC3       | LYNX1        | ZNF391       | SLC13A5      | ITGA7        | LARGE1     | STYK1        | ASPM         | IL23A      |            |
| TPX2         | NOX4         | HMMR         | DEPDC1       | CENPK      | MIR155       | SULT1C2      | KIF1A        | TFE3         | LINC00563    | LYG1         | DCDC2      | HIP1R        | BTNL9        | BAIAP2     |            |
| BIRC5        | SLC26A7      | STIL         | CDH6         | APLNR      | ADAM5        | FOLR3        | OLFML2A      | STON2        | TBC1D5       | LINC00184    | SCAF4      | BAZZA        | C10orf99     | FZD10-AS1  |            |
| CDT1         | C1orf186     | CDK1         | CP           | COL4A1     | ARHGEF39     | ASPM         | MTBP         | SUSD2        | LOC105369705 | C16orf59     | DUXAP10    | WDR97        | PCDH7        | MECOM      |            |
| KIF4A        | GIN54        | ATAD2        | SLC34A2      | PGGHG      | GJB3         | MAGEA1       | MAP4K1       | BHLHA15      | KCNK12       | KMT2E-AS1    | S100A4     | LOC339622    | CDH18        | CCDC74B    |            |
| KIF2C        | SOX17        | VDR          | LINC00523    | KIF23      | TRAF4        | ALS2CR11     | CLUH         | NCAM1        | AGFG1        | FAM47B       | CDSN       | UGT2B4       | LINC00673    | XPNPEP2    |            |
| NCAPG        | FAM64A       | OR7E37P      | LOC100130502 | TK1        | RPARP-AS1    | LINC01333    | SKIL         | LOC100505782 | COL13A1      | SSX4B        | SLC45A2    | OFCC1        | FGFR2        | LOC399900  |            |
| AURKA        | XKR4         | CHEK1        | CDH6         | MROH1      | CEMIP        | CACNA1D      | LOC100506274 | SULT1C2      | C22orf34     | LOC101928014 | FLG        | LOC613266    | SIX1         | HOXB7      |            |
| ORC6         | MYO10        | GIN51        | PLAC1        | NUP210     | KRTAP4-1     | DGAT1        | ESRG         | MYO10        | VMA21        | ATP10B       | PAQR6      | LINC00664    | HIST1H2AH    | NAGLU      |            |
| MKI67        | TIMELESS     | DUXAP10      | DIRAS2       | NOTCH3     | LOC105376796 | MXD3         | SIPA1L3      | USF28        | AURKB        | SOX11        | ARPP21     | DOCK9        | DIAPH3       | MEGF10     |            |
| C12orf56     | CXXC5        | TSPAN12      | NEAT1        | UCP2       | PABPC1       | ASMTL-AS1    | MAPKAPK2     | C3orf80      | ACSM2A       | CPEB3        | APOA1      | HAPLN1       | RANGAP1      | SOX4       |            |
| RAD51        | LOC101927929 | ACVRL1       | CDK1         | BIRC5      | OXLD1        | TLCD1        | CRTAC1       | LINC01410    | BK1          | CLDN6        | KCNMB2-AS1 | CLDN18       | LIN28B       | HJURP      |            |
| SNF          | STON2        | RAB39B       | TNF          | CDC6       | PSD2         | ARHGAP11B    | PRSS2        | ST3GAL3      | MCF2L        | AFF3         | CCDC167    | TBC1D10C     | ENDOG        | SOX11      |            |

|              |          |           |              |              |           |              |              |            |              |              |              |              |              |         |
|--------------|----------|-----------|--------------|--------------|-----------|--------------|--------------|------------|--------------|--------------|--------------|--------------|--------------|---------|
| TFAP2A       | RACGAP1  | FANCA     | CD24         | RUNX1        | LYPD6     | TMPRSS4      | ZNF710       | CBS        | KCNV1        | REG4         | NPTX2        | NR5A2        | RAD54B       | HOXD13  |
| BOLA2B       | ASS1     | FOXA3     | GPRC5B       | GPR137C      | TMTC4     | FBXL22       | NETO2        | ARL6IP4    | LOC284661    | LOC100505609 | CLEC5A       | BRICD5       | SYN2         | ADGRV1  |
| UBE2C        | PABPC1L  | KIAA0101  | ANGPT2       | CXCL13       | HEY2      | FMNL3        | CCNB3        | TRMT1      | SLC39A14     | LINC01503    | HNRNPU       | ZNF396       | CELSR3-AS1   | AOC1    |
| BUB1         | PAX8     | FOLR1     | RNF157-AS1   | FAM124A      | HRASLS2   | NAA38        | ESPN         | GOLGA6A    | STRA13       | DRD3         | PALM3        | CHGA         | LOC101928526 | WNT11   |
| POC1A        | PTTG1    | VMP1      | C1orf186     | FOXP4-AS1    | SMIM22    | SLC7A5P1     | INSL6        | BANCR      | CXCR4        | HTR1F        | FAM71E1      | ZFP1         | HIST2H4B     | NLRP7   |
| ERFE         | CP       | MSX1      | SAC3D1       | ZFPL1        | HIST2H4   | RASGEF1A     | HMGA2        | VWF        | GTSE1        | DAPL1        | LINC01222    | KLHL3        | LINC00700    | MEIOC   |
| CCNB2        | ARAP3    | WHSC1     | CYYR1        | CDC45        | LOC150051 | KIAA1217     | COL9A1       | SOX9       | WISP3        | SLC8A1       | SH3GL3       | HN1          | CDC25A       | OIT3    |
| CKS2         | CCNB1    | SLC35F6   | KCNG1        | MKI67        | DEPDC1    | PDE11A       | ENDOU        | TMEM169    | S100A2       | TNK2         | IGF2BP3      | MYCNOS       | PIKFYVE      | CFAP157 |
| CCNE1        | PILRB    | TPCN2     | NES          | RIPPLY2      | TRIP13    | MFSD7        | KLHL25       | SOGA1      | LOC105375839 | C11orf96     | FAM65A       | GRIA2        | ITGB2        | EHF     |
| AIF1L        | ZBTB42   | SYT11     | LAMTOR5-AS1  | MCAM         | RECQL4    | STK38        | HIPK3        | CCSAP      | UNC13A       | AUNIP        | TMEM45B      | CSMD2        | TBX2         | RXFP1   |
| GLDC         | GDF11    | CDKN2A    | FMNL3        | LOC100289283 | CEP55     | SDCBP2-AS1   | TNFRSF12A    | LINC00454  | EWSAT1       | SNX32        | MUC5AC       | BCAT1        | SCGB1C2      | SCGB2A1 |
| LOC102724312 | PTPRG    | MICALL2   | ATXN7L1      | CDCA8        | SEPT8     | TAPBP        | FANCB        | FILIP1     | FZD10        | INSM1        | STAB1        | ALDH1L2      | EXOC5        | FOXQ1   |
| CXXC5        | WNT7A    | ADCY4     | CYYR1        | HIST1H2AM    | BOP1      | BCL11A       | ITGB8        | GOLGA6L2   | LINC00173    | SYNE4        | ABTB2        | PART1        | CAMKMT       | ATF5    |
| GGCX         | EMC3-AS1 | CRABP2    | LGALS9       | UNC5A        | CASZ1     | EMC1         | C2CD3        | ANGPT2     | ASTN2        | CYP19A1      | ROCK1        | ZIC1         | GAN          | SLC12A1 |
| PRR11        | CENPF    | GLDN      | ELF3         | LOC285812    | RASSF10   | KIF14        | MIR142       | RAB1A      | PAX6         | LOC101559451 | NRG3         | LOC100288570 | TFAP2D       | KRT23   |
| KLK8         | CDH6     | FLT1      | DENND4B      | PYM1         | APBA2     | CHCHD10      | LETM1        | NEURL1B    | LOC105373764 | AJAP1        | CAPN9        | CDH24        | ANKRD65      |         |
| PAX8         | CD24     | SPC24     | VSIG10       | LPCAT4       | ADM5      | ZNF578       | CASQ2        | SUSD4      | UBE2O        | C17orf96     | GATA3        | BCAT1        | TIMM8A       |         |
| KIAA1217     | PIF1     | COL4A1    | ST6GALNAC1   | LINGO1       | FOXN1     | LOC101928047 | SSTR1        | TOP2A      | SNN          | HOXB8        | C5orf46      | APOA1        | SDC1         |         |
| CENPU        | CDC25C   | EPB41L5   | MROH2A       | LOC101928271 | ECSCR     | TNRC6C-AS1   | ILDRI        | RAD54L     | RHD          | OLIG2        | ARPC4        | SNAPC4       | COL23A1      |         |
| NR2F6        | LHX6     | RELT      | SLC19A1      | MAGEA5       | MEX3A     | ANKS4B       | RIMS3        | GPR39      | FGF8         | TNNT1        | RAB17        | ZFP36L2      | INCENP       |         |
| CXXC5        | EZH2     | EXO1      | FDX1L        | TMEM102      | HOXD-AS2  | KIF11        | TACC3        | THADA      | SLC38A10     | MATR3        | CXCL17       | SLC06A1      | PTGER1       |         |
| S100A13      | MTHFD2   | CATIP-AS1 | LIMS4        | CCM2L        | CTHRC1    | GAGE12D      | LOC101927523 | SIX3       | MKRN2        | CCNA2        | HES6         | ZNF93        | ICOS         |         |
| HMGA1        | ANGPT2   | FANCI     | GRHL2        | MEOX1        | GUCY1A3   | VPS8         | ME3          | ZNF672     | TFAP2B       | LINC00276    | LOC102724156 | PART1        | LINC00491    |         |
| BSPRY        | GNGT1    | GNAS      | LYPD1        | TMPO-AS1     | RNF144B   | NAA38        | GPSM2        | WDR72      | COX8C        | KLF12        | EFCAB3       | PDE4D        | COL5A1       |         |
| FZD2         | GUCY1A3  | MPZL2     | NRP2         | MPZL2        | FOXH1     | WDR72        | NCAPG        | FAM111B    | LCN2         | CYP19A1      | ANKRD30BP3   | COL15A1      | C8orf4       |         |
| ERCC6L       | GJC1     | DNPH1     | TNNI3        | MTRF1L       | ERV3-2    | KCTD1        | MCM10        | HIST1H1C   | IQCF5-AS1    | MCM5         | SLC6A2       | LOC285422    | LINC00969    |         |
| SORT1        | TOP2A    | GDF11     | PRRG2        | VWA1         | SPON1     | RUSC1-AS1    | CDH6         | ESRP1      | CCDC150      | ST3GAL6      | RNF144A-AS1  | CDIPT-AS1    | LIX1         |         |
| SNTB1        | KLHL14   | COL4A2    | PLXND1       | KCTD1        | KIFC1     | CP           | LOC100507670 | TTC39A     | CCDA3        | INHBB        | SNHG4        | SERINC2      | MCM7         |         |
| NCAPH        | VEGFA    | CHTF18    | SLC13A4      | GRAMD2       | BCL11A    | GOLGA8A      | LRIG2        | GUCY1B3    | LINC01271    | APOE         | MUC1         | PAX5         | AIM2         |         |
| MECOM        | BCL11A   | FGF18     | LOC100507468 | XDH          | RNASEH2A  | XK           | CCR7         | MCM3AP-AS1 | HIST1H1A     | LOC100652911 | FOXR2        | PRSS23       | PDCL2        |         |

**Table S5.** GO and KEGG analysis of common genes.

| ONTOLOGY | ID         | Description                                                                           | Gene Ratio | P value | P adjust |
|----------|------------|---------------------------------------------------------------------------------------|------------|---------|----------|
| BP       | GO:0051782 | negative regulation of cell division                                                  | 3/34       | 0.0000  | 0.0056   |
| BP       | GO:0090068 | positive regulation of cell cycle process                                             | 6/34       | 0.0000  | 0.0092   |
| BP       | GO:0008608 | attachment of spindle microtubules to kinetochore                                     | 3/34       | 0.0000  | 0.0111   |
| BP       | GO:0045787 | positive regulation of cell cycle                                                     | 6/34       | 0.0001  | 0.0188   |
| BP       | GO:0048255 | mRNA stabilization                                                                    | 3/34       | 0.0001  | 0.0188   |
| BP       | GO:0043489 | RNA stabilization                                                                     | 3/34       | 0.0001  | 0.0207   |
| BP       | GO:1902373 | negative regulation of mRNA catabolic process                                         | 3/34       | 0.0001  | 0.0207   |
| BP       | GO:0000082 | G1/S transition of mitotic cell cycle                                                 | 5/34       | 0.0001  | 0.0221   |
| BP       | GO:1902369 | negative regulation of RNA catabolic process                                          | 3/34       | 0.0002  | 0.0221   |
| BP       | GO:0044843 | cell cycle G1/S phase transition                                                      | 5/34       | 0.0002  | 0.0221   |
| CC       | GO:1990023 | mitotic spindle midzone                                                               | 2/35       | 0.0002  | 0.0133   |
| CC       | GO:0010369 | chromocenter                                                                          | 2/35       | 0.0003  | 0.0133   |
| CC       | GO:0098687 | chromosomal region                                                                    | 5/35       | 0.0004  | 0.0133   |
| CC       | GO:0005581 | collagen trimer                                                                       | 3/35       | 0.0005  | 0.0139   |
| CC       | GO:0072686 | mitotic spindle                                                                       | 3/35       | 0.0009  | 0.0214   |
| CC       | GO:0051233 | spindle midzone                                                                       | 2/35       | 0.0017  | 0.0312   |
| CC       | GO:0090575 | RNA polymerase II transcription factor complex                                        | 3/35       | 0.0030  | 0.0464   |
| CC       | GO:0030496 | midbody                                                                               | 3/35       | 0.0035  | 0.0464   |
| CC       | GO:0044420 | extracellular matrix component                                                        | 2/35       | 0.0037  | 0.0464   |
| CC       | GO:0000775 | chromosome, centromeric region                                                        | 3/35       | 0.0048  | 0.0505   |
| MF       | GO:0030020 | extracellular matrix structural constituent conferring tensile strength               | 3/33       | 0.0001  | 0.0091   |
| MF       | GO:0016646 | oxidoreductase activity, acting on the CH-NH group of donors, NAD or NADP as acceptor | 2/33       | 0.0006  | 0.0373   |
| MF       | GO:0003688 | DNA replication origin binding                                                        | 2/33       | 0.0009  | 0.0373   |
| MF       | GO:0004674 | protein serine/threonine kinase activity                                              | 5/33       | 0.0012  | 0.0373   |
| MF       | GO:0016645 | oxidoreductase activity, acting on the CH-NH group of donors                          | 2/33       | 0.0012  | 0.0373   |
| MF       | GO:0005201 | extracellular matrix structural constituent                                           | 3/33       | 0.0034  | 0.0778   |
| MF       | GO:1990841 | promoter-specific chromatin binding                                                   | 2/33       | 0.0036  | 0.0778   |
| KEGG     | hsa00670   | One carbon pool by folate                                                             | 2/16       | 0.0007  | 0.0260   |
| KEGG     | hsa04974   | Protein digestion and absorption                                                      | 3/16       | 0.0010  | 0.0260   |
| KEGG     | hsa04110   | Cell cycle                                                                            | 3/16       | 0.0017  | 0.0296   |
| KEGG     | hsa05167   | Kaposi sarcoma-associated herpesvirus infection                                       | 3/16       | 0.0060  | 0.0725   |
| KEGG     | hsa05203   | Viral carcinogenesis                                                                  | 3/16       | 0.0070  | 0.0725   |
